# Supplementary material
Source: PubMed Central journal article supplement (PMC3457449)
Supplement: JCM.01509-12_zjm999091968so1.pdf [file JCM.01509-12_zjm999091968so1.pdf]

Supplemental Material Figure S1. Reverse phase HPLC analysis of ochratoxin in the culture filtrates from *Aspergillus westerdijkiae* (NRRL5175) and *Aspergillus tanneri* strains NIH1004 (NRRL62425) and NIH1005 (NRRL62426).

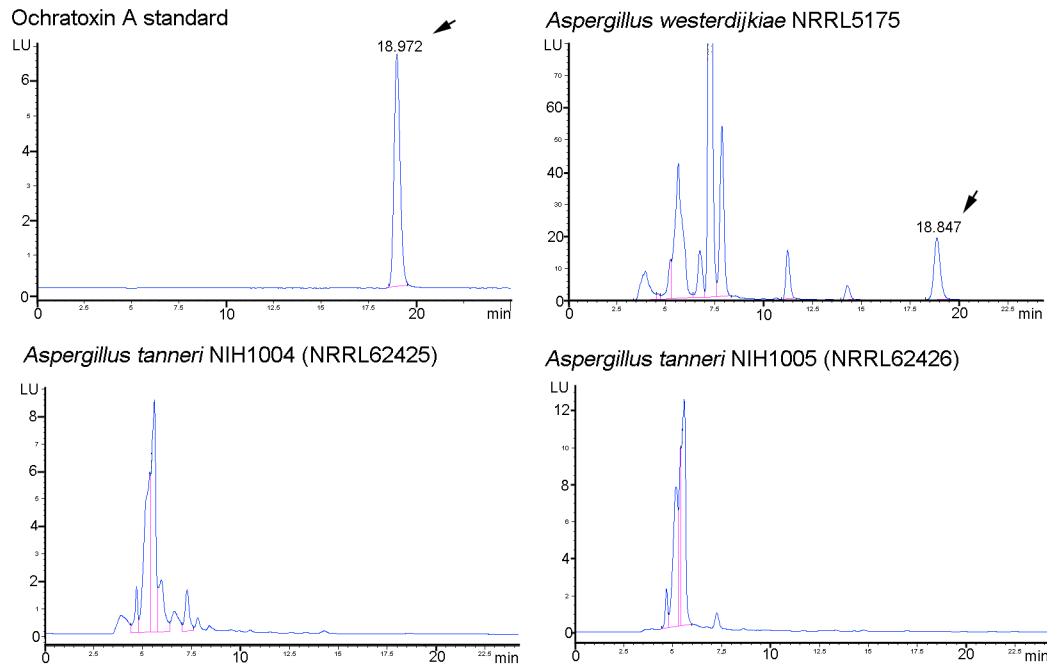

**Upper left panel.** Ochratoxin standard (10 ng). The arrow indicates the ochratoxin peak.

**Upper right panel.** Chromatogram from *Aspergillus westerdijkiae* culture filtrate, a known producer of ochratoxin. The arrow indicates the ochratoxin peak. Peaks eluting before 15 min, some of which are due to media components, are of unknown identity.

**Left and right lower panels.** Chromatograms from *Aspergillus tanneri* culture filtrate. The peak at 18.9 min corresponding to ochratoxin is absent in both isolates. The LU axis represents fluorescence emission at 469 nm. Excitation was at 332 nm. Representative HPLC analyses are shown. Strains were cultured in Yeast Extract Sucrose broth.
